# Supplementary material for: The Interplay of Macrofauna Functional Groups Shapes Nitrogen Cycling in Oligotrophic Estuarine Sediments
Source: Research Square preprint supplement (doi:10.21203/rs.3.rs-370095/v1), 2021-04-14
Supplement: Supplementary file 1 [file 1e5ebdeb44498c6b219d7dda.docx]

**THE INTERPLAY OF MACROFAUNA FUNCTIONAL GROUPS SHAPES NITROGEN CYCLING IN OLIGOTROPHIC ESTUARINE SEDIMENTS**

Mindaugas Zilius1,2*, Darius Daunys1, Marco Bartoli1,3, Ugo Marzocchi1,4,5, Stefano Bonaglia1,6,7, Ulisse Cardini8, Giuseppe Castaldelli2

1 Marine Research Institute, Klaipeda University, 92294 Klaipeda, Lithuania

2 Department of Life Science and Biotechnology, Ferrara University, 44121 Ferrara, Italy

3 Department of Chemistry, Life science and Environmental Sustainability, Parma University, 43124 Parma, Italy

4 Center for Electromicrobiology, Section for Microbiology, Department of Biology, Aarhus University, 8000 Aarhus, Denmark

5 Center for Water Technology (WATEC), Department of Biology, Aarhus University, 8000 Aarhus, Denmark

6 Department of Marine Sciences, University of Gothenburg, Box 461, 40530 Gothenburg, Sweden

7 Department of Biology, University of Southern Denmark, 5230 Odense, Denmark

8 Integrative Marine Ecology Department, Stazione Zoologica Anton Dohrn, National Institute of Marine Biology, Ecology and Biotechnology, 8012 Napoli, Italy

**SUPPLEMENTARY MATERIAL**

**Table S1** The checklist of macrofauna taxa recovered from incubated intact sediment cores

| **Taxon** | **Intact core ID** | | | | | | | | | | | | | | | | | |  |
| --- | --- | --- | --- | --- | --- | --- | --- | --- | --- | --- | --- | --- | --- | --- | --- | --- | --- | --- | --- |
| 1 | 2 | 3 | 4 | 5 | 6 | 7 | 8 | 9 | 10 | 11 | 12 | 13 | 14 | 15 | 16 | 17 | 18 |  |
| *Monoporeia affinis* | + | + | + | + | + | + | + | + | + | + | + | + | + | + | + | + | + | + |  |
| *Marenzelleria* sp. | + | + | + | + | + | + | + | + | + | + | + | + | + | + | + | + | + | + |  |
| *Limecola balthica* |  | + |  | + |  |  | + | + | + | + | + | + | + | + | + |  | + |  |  |
| Oligochaeta | + | + | + | + | + | + | + | + | + | + | + | + | + | + | + | + | + | + |  |
| *Corophium volutator* |  |  |  | + |  | + | + | + | + | + |  |  | + |  | + | + | + |  |  |
| Chironomidae |  | + | + | + |  |  | + | + | + | + |  |  |  |  | + | + | + |  |  |
| *Pygospio elegans* |  |  |  |  |  |  |  |  |  | + |  |  |  |  |  |  |  |  |  |
| *Saduria entomon* |  |  |  |  |  |  | + |  |  |  |  |  |  |  |  |  |  |  |  |
| *Hydrobia* |  |  |  |  |  |  |  |  |  |  |  |  |  |  | + |  |  |  |  |
| *Hydrobiidae* |  |  |  |  |  | + |  |  |  |  |  |  |  |  |  |  |  |  |  |

**Table 2S** Equations used to calculate the N flow in Figure 8. Dtot – total denitrification rates, Dw – denitrification due to NO3– diffusion from overlaying water, Dn – coupled nitrification-denitrification, DNRA – dissimilative nitrate reduction to ammonium, DNRAn – coupled nitrification-DNRA, DNRAw – DNRA due to NO3- diffusion from overlaying water, N:C is molar ration between nitrogen and carbon in surface sediment, TOU – total oxygen uptake by sediments

| **No.** | **Pathway of N** | **Determination** | **Equation** |
| --- | --- | --- | --- |
| 1 | NH4+ efflux | measured | – |
| 2 | NOx– efflux | measured | – |
| 3 | Dtot | measured | – |
| 4 | Dw | measured | – |
| 5 | Dn | calculated | (3) – (4) |
| 6 | DNRAn | measured | – |
| 7 | DNRAw | measured | – |
| 8 | Animal excretion | measured | – |
| 9 | Nitrification | calculated | (2) + (5) + (6) |
| 10 | Mineralization | calculated | ((11) – (12) – (13)) × 1 × N:C |
| 11 | TOU | measured | – |
| 12 | O2 animal resp. | measured | – |
| 13 | O2 nitrification | calculated | 2 × (9) |

NOx- flux – measured combined NO2- and NO3- flux at the sediment-water interface via whole incubations.
